# Supplementary material for: Facile synthesis of 3D hierarchical foldaway-lantern-like LiMnPO4 by nanoplate self-assembly, and electrochemical performance for Li-ion batteries
Source: Royal Society of Chemistry journal article supplement (doi:10.1039/c2dt30630a), 2012-01-01
Supplement: c2dt30630a.pdf [file c2dt30630a.pdf]

Electronic Supplementary Information (ESI) for

# Facile Synthesis of 3D Hierarchical Foldaway-lantern-like $\text{LiMnPO}_4$ by Nanoplate Self-Assembly and Electrochemical Performance for Li-Ion Batteries

Dezhi Chen,<sup>a,b</sup> Wei Wei,<sup>a</sup> Ruining Wang,<sup>a</sup> Xiufeng Lang,<sup>a</sup> Yu Tian,<sup>a</sup> Lin Guo<sup>a</sup>

<sup>a</sup> School of Chemistry and Environment, Beihang University, Beijing 100191, People's Republic of China

<sup>b</sup> School of Environmental and Chemical Engineering, Nanchang Hangkong University, Nanchang 330063, People's Republic of China

\* E-mail: guolin@buaa.edu.cn

## Supporting information:

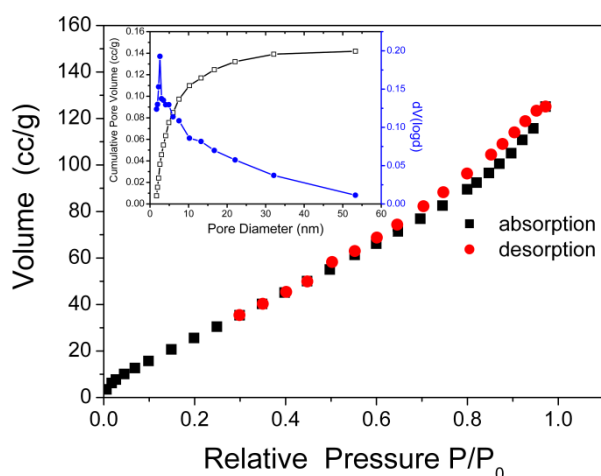

**Fig. S1.**  $\text{N}_2$  adsorption/desorption isotherms and pore size distribution (inset) of 3D hierarchical foldaway-lantern-like  $\text{LiMnPO}_4$  microstructure.

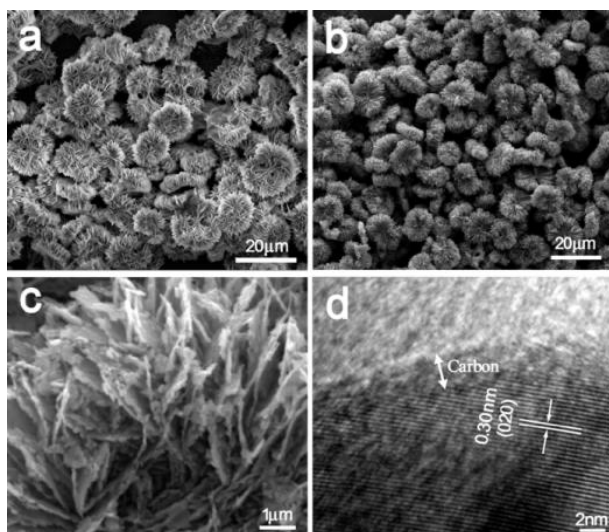

**Fig. S2.** (a) SEM images of  $\text{LiMnPO}_4/\text{C}_{220}$  using D-gluconic acid lactone as the carbon source; (b) SEM and magnified images of  $\text{LiMnPO}_4/\text{C}_{700}$ ; (d) HRTEM image of  $\text{LiMnPO}_4/\text{C}_{700}$

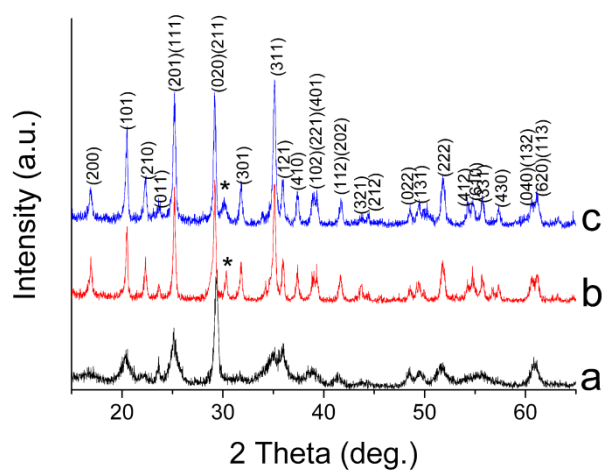

**Fig. S3.** XRD patterns of LiMnPO<sub>4</sub>/C<sub>220</sub> (a) and LiMnPO<sub>4</sub>/C<sub>700</sub> before (b) and (c) after ball milling with 20 wt % conductive carbon (\* Mn<sub>2</sub>P<sub>2</sub>O<sub>7</sub>)

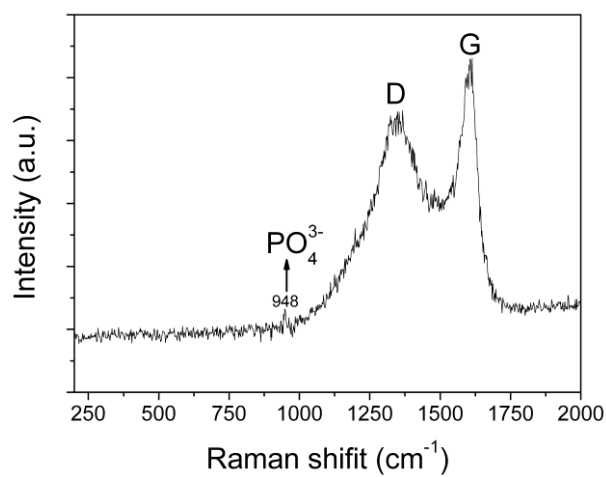

**Fig. S4.** Raman spectra of LiMnPO<sub>4</sub>/C<sub>700</sub>

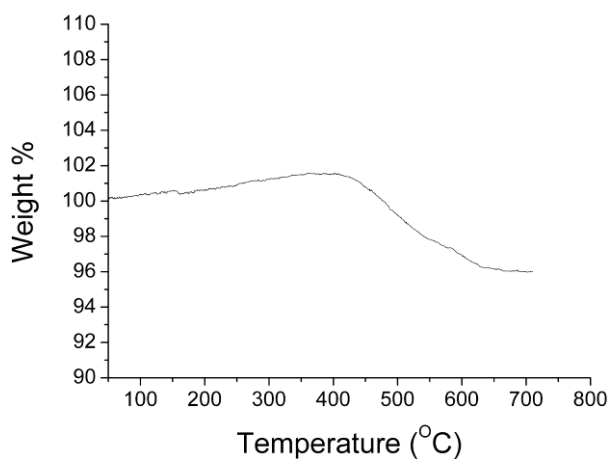

**Fig. S5.** TG curve of LiMnPO<sub>4</sub>/C<sub>700</sub>

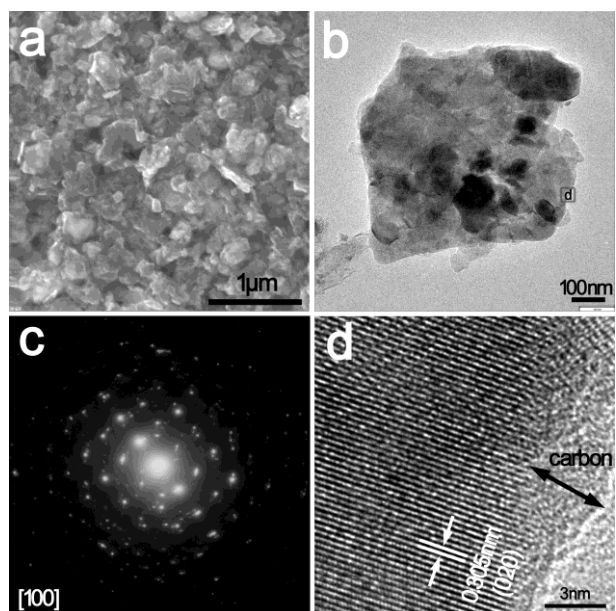

**Fig. S6** (a) SEM and (b) TEM images of  $\text{LiMnPO}_4/\text{C}_{700}$  nanoplates after balling milling; (c) SAED pattern of  $\text{LiMnPO}_4/\text{C}_{700}$  nanoplates after balling milling and HRTEM images of selected area in (b).
